# Supplementary material
Source: PubMed Central journal article supplement (PMC6021292)
Supplement: 10616_2018_229_MOESM1_ESM.pdf [file 10616_2018_229_MOESM1_ESM.pdf]

Table S1 Information related to mushrooms

| Number | Scientific name                  | Location/height       | Accession number |
|--------|----------------------------------|-----------------------|------------------|
| 1      | <i>Ganoderma carnosum</i>        | Mt. Phulchoki/2,765 m | AB763348         |
| 2      | <i>Ganoderma lingzhi</i>         | Mt. Phulchoki/2,765 m | AB811848         |
| 3      | <i>Ganoderma australe</i>        | Mustang/3,150 m       | AB811849         |
| 4      | <i>Ganoderma australe</i>        | Mt. Phulchoki/2,765 m | AB811850         |
| 5      | <i>Ganoderma australe</i>        | Mt. Phulchoki/2,765 m | N.D.             |
| 6      | <i>Ganoderma australe</i>        | Dawachok/1,500 m      | AB811852         |
| 7      | <i>Postia stiptica</i>           | Dawachok/1,500 m      | AB811853         |
| 8      | <i>Phlebia tremellosa</i>        | Mt. Phulchoki/2,765 m | AB811854         |
| 9      | <i>Trametes versicolor</i>       | Mt. Phulchoki/2,765 m | AB811855         |
| 10     | <i>Inonotus andersonii</i>       | Mt. Phulchoki/2,765 m | AB811856         |
| 11     | <i>Trametes versicolor</i>       | Mt. Phulchoki/2,765 m | AB811857         |
| 12     | <i>Inonotus</i> sp. 1            | Mt. Phulchoki/2,765 m | N.D.             |
| 13     | <i>Heterobasidion linzhiense</i> | Surya Binayak/1,400 m | AB811859         |
| 14     | <i>Trametes versicolor</i>       | Mt. Phulchoki/2,765 m | AB811860         |
| 15     | <i>Heterobasidion linzhiense</i> | Mt. Phulchoki/2,765 m | AB811861         |
| 16     | <i>Phellinus gilvus</i>          | Mt. Phulchoki/2,765 m | AB811862         |
| 17     | <i>Inonotus</i> sp. 2            | Mt. Phulchoki/2,765 m | N.D.             |
| 18     | <i>Phellinus conchatus</i>       | Nagarkot/2,500 m      | AB811863         |
| 19     | <i>Phellinus conchatus</i>       | Nagarkot/2,500 m      | AB811864         |
| 20     | <i>Inocybe</i> sp.               | Mt. Phulchoki/2,765 m | N.D.             |
| 21     | <i>Collybia peronata</i>         | Nagarkot/2,500 m      | N.D.             |
| 22     | <i>Inonotus</i> sp. 3            | Mt. Phulchoki/2,765 m | AB811865         |
| 23     | <i>Lactarius Hatsudake</i>       | Mustang,3,150 m       | N.D.             |
| 24     | <i>Lenzites betulina</i>         | Mt. Phulchoki/2,765 m | AB811866         |
| 25     | <i>Panellus</i> sp.              | Mt. Phulchoki/2,765 m | N.D.             |
| 26     | <i>Rigidoporus</i> sp.           | Surya Binayak/1,400 m | N.D.             |
| 27     | <i>Trametes versicolor</i>       | Mt. Phulchoki/2,765 m | AB811867         |
| 28     | <i>Trametes versicolor</i>       | Mt. Phulchoki/2,765 m | AB811868         |
| 29     | <i>Tricholoma caligatum</i>      | Mt. Phulchoki/2,765 m | N.D.             |

N.D.: not determined
